# Supplementary material for: CD inversion and fluorescence enhancement in organic nanoparticles of (R)-di-2-naphthylprolinol
Source: Royal Society of Chemistry journal article supplement (doi:10.1039/b412983k), 2004-12-02
Supplement: b412983k.pdf [file b412983k.pdf]

## Supporting Information

### 1. 2D-NMR spectrum of DNP molecule

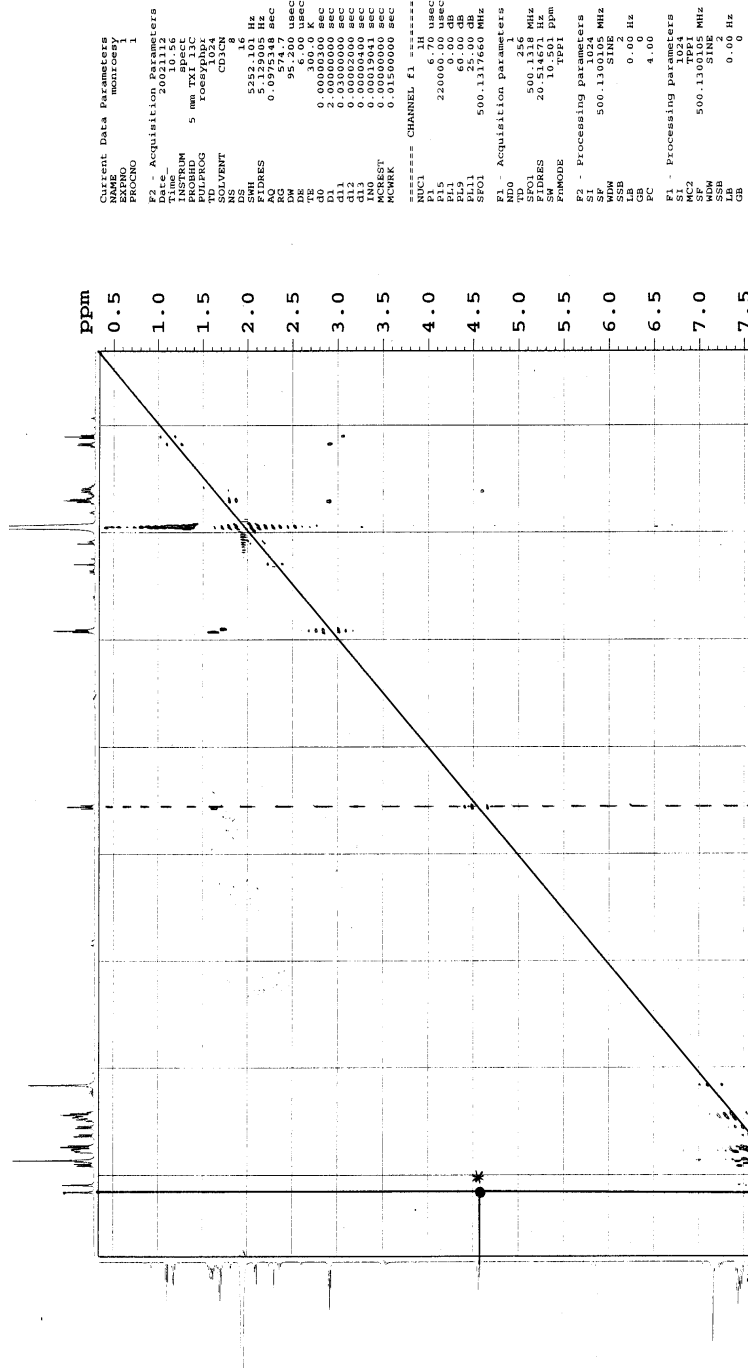

2. 2D-NMR spectrum of DNP nanoparticles.

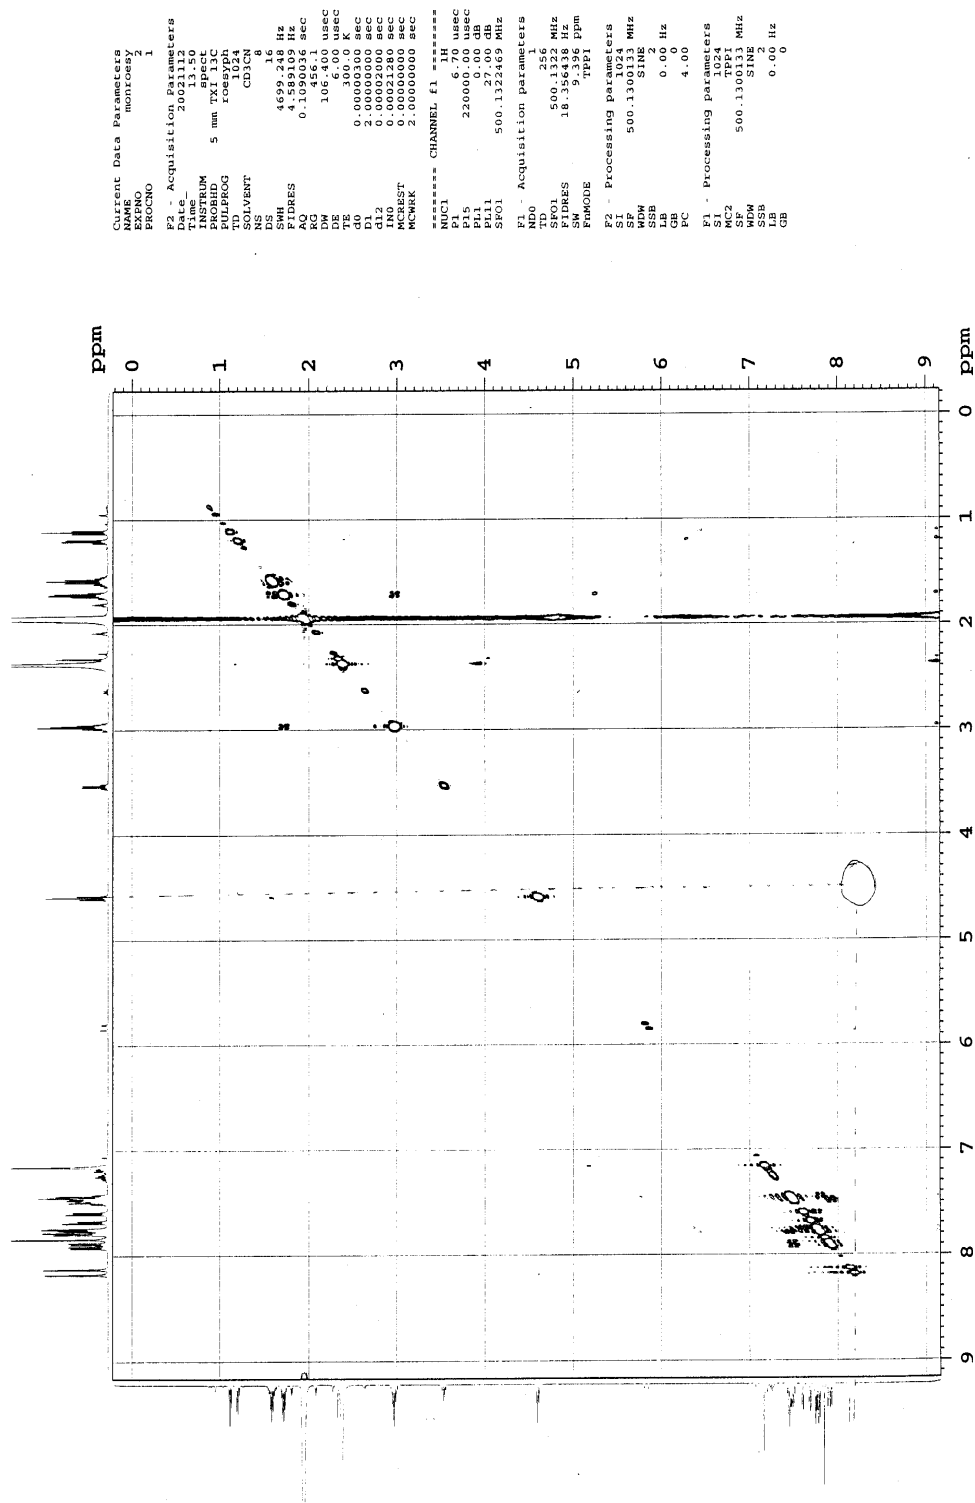

With comparison of the above two NMR spectra, it is deduced that there exists strong interaction between  $\alpha$ -H in case of monomers, while the interaction disappears in case of the nanoparticles.
